# Supplementary material for: An Internally Quenched Fluorescent Peptide Substrate for Protealysin
Source: PubMed Central journal article supplement (PMC6778150; doi:10.1038/s41598-019-50764-2), 2019-10-04

## **SUPPLEMENTARY INFORMATION**

### **An Internally Quenched Fluorescent Peptide Substrate for Proteolysis**

Maria A. Karaseva<sup>1</sup>, Ksenia N. Chukhontseva<sup>1</sup>, Irina S. Lemeskina<sup>1</sup>, Marina L. Pridatchenko<sup>2</sup>, Sergey V. Kostrov<sup>1</sup>, and Ilya V. Demidyuk<sup>1</sup>

<sup>1</sup>Institute of Molecular Genetics, Russian Academy of Sciences, Moscow, Russia

<sup>2</sup>V.L. Talrose Institute for Energy Problems of Chemical Physics, N.N. Semenov Federal Research Center of Chemical Physics, Russian Academy of Sciences, Moscow, Russia

Correspondence and requests for materials should be addressed to I.V.D. (email: duk@img.ras.ru)

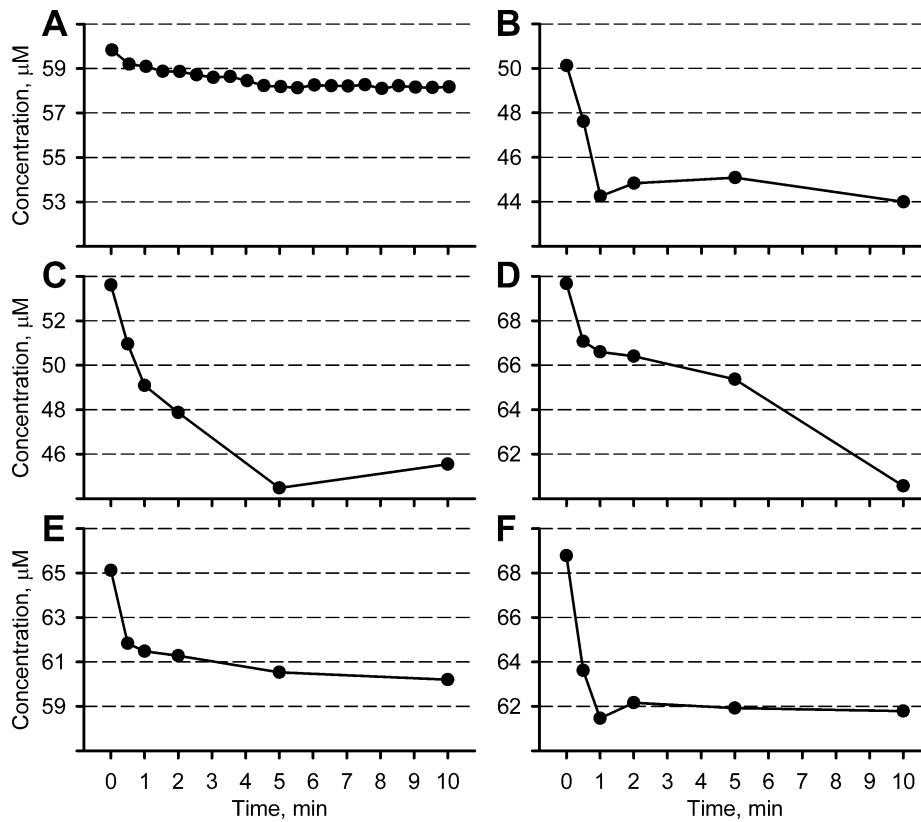

**Figure S1. Abz-RSVIK(Dnp) sorption.** A. Changes in Abz-RSVIK(Dnp) concentration during incubation in a quartz cell for spectrophotometry. B. Changes in Abz-RSVIK(Dnp) concentration during incubation in a microplate for fluorescence-based assays (Costar, Cat. #3915). C, D, E, and F. Changes in Abz-RSVIK(Dnp) concentration during incubation in microcentrifuge tubes from different manufacturers: SSI (Cat. #1260), Eppendorf (Protein LoBind, Cat. #022431081), GenFollower (Cat. #MCTB015), and Corning-Costar (Cat. #3620), respectively.

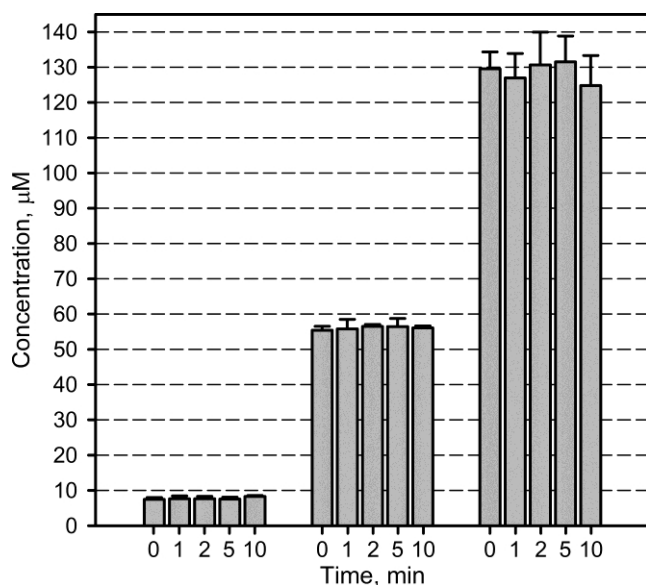

**Figure S2. Abz-RSVIK(Dnp) concentration remains constant during incubation in pretreated microplates for fluorescence-based assays.** Such pretreatment of plates was used in further enzyme activity assays. Different substrate concentrations (100  $\mu$ l) were added to wells of a 96-well microplate. After incubation at 37°C for 10 min, 25  $\mu$ l were discarded and 25  $\mu$ l of 50 mM Tris-HCl (pH 7.4) was mixed with the well contents. The substrate concentration was quantified spectrophotometrically immediately after the buffer was added as well as after time intervals specified. Values are represented as the mean and SD of three independent experiments.

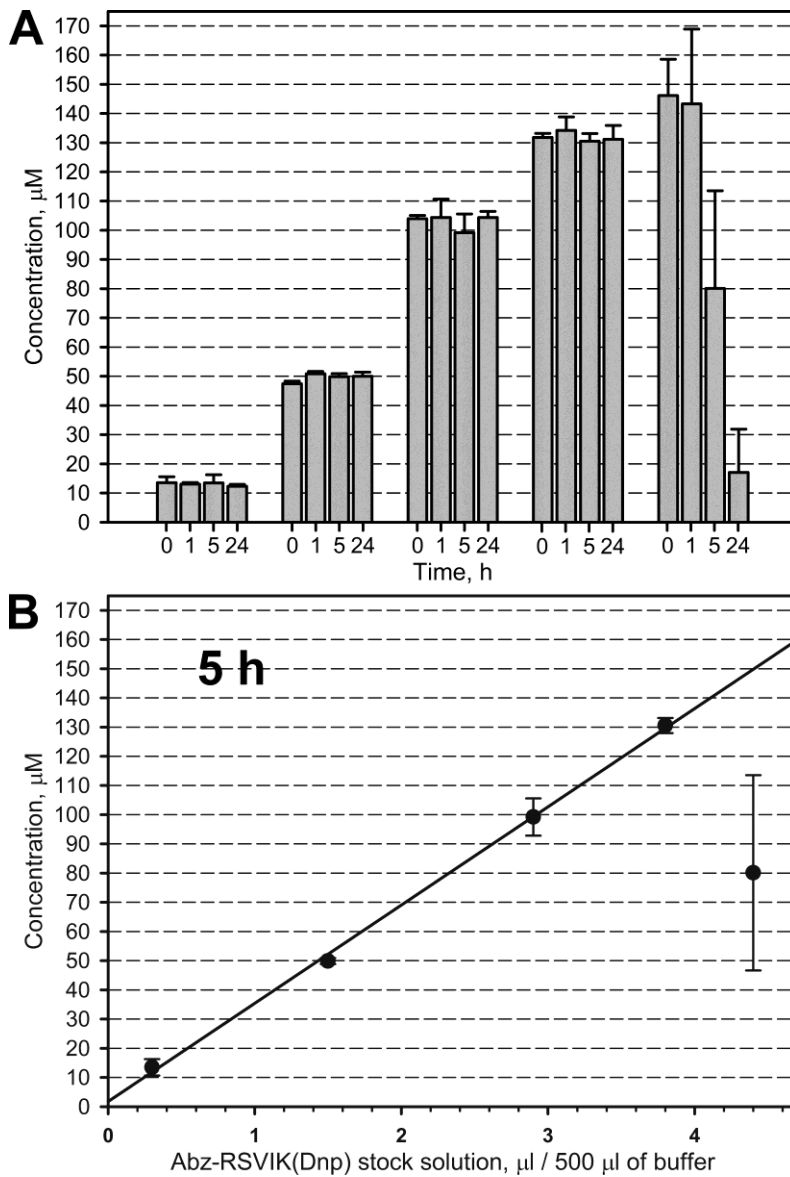

**Figure S3. Solubility of Abz-RSVIK(Dnp).** Different substrate concentrations were prepared in microcentrifuge tubes (SSI). The stock solution was diluted with DMSO 1.3-20 times. The resulting solutions (6  $\mu\text{l}$ ) were supplemented with 500  $\mu\text{l}$  of 50 mM Tris-HCl (pH 7.4). The solutions were incubated at room temperature and the concentration changes were controlled spectrophotometrically at 365 nm. The first measurement was made after 10 min (“0 h”) and then after time periods specified here. Values are represented as the mean and SD of three independent experiments. A. Measured substrate concentrations for all dilutions and time periods. B. Relationship between substrate concentration and stock quantity 5 h after dilution.

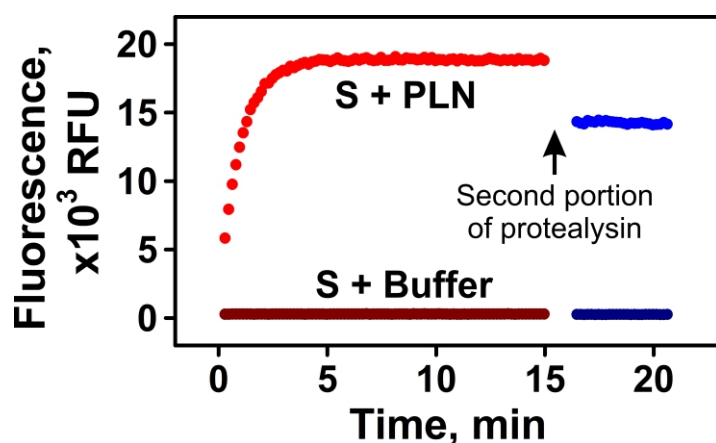

**Figure S4. Complete hydrolysis of Abz-RSVIK(Dnp).** Substrate solution (100  $\mu$ l) in was added to a well of a 96-well plate and incubated at 37°C for 10 min. After the incubation, 25  $\mu$ l of substrate were discarded and 25  $\mu$ l of 50 nM protealysin (PLN) were added. The reaction mixture was incubated at 37°C for 15 min and the fluorescence signal was monitored. Then, 25  $\mu$ l of the mixture were replaced with 25  $\mu$ l of 50 nM PLN and the fluorescence signal was monitored during the incubation at 37°C for 5 min. The interval between the measurements was 1 min 30 s. After the first and second addition of the enzyme, the reaction mixture contained 15  $\mu$ M Abz-RSVIK(Dnp) + 12,5 nM PLN and 11.25  $\mu$ M Abz-RSVIK(Dnp) + 21.9 nM PLN, respectively. The reaction was carried out in 50 mM Tris-HCl (pH 7.4). Red and blue circles indicate the fluorescence signal after the first and second addition of PLN, respectively (S + PLN); while brown and dark blue circles indicate the control fluorescence where 25  $\mu$ l of the buffer was added instead of PLN (S + Buffer).

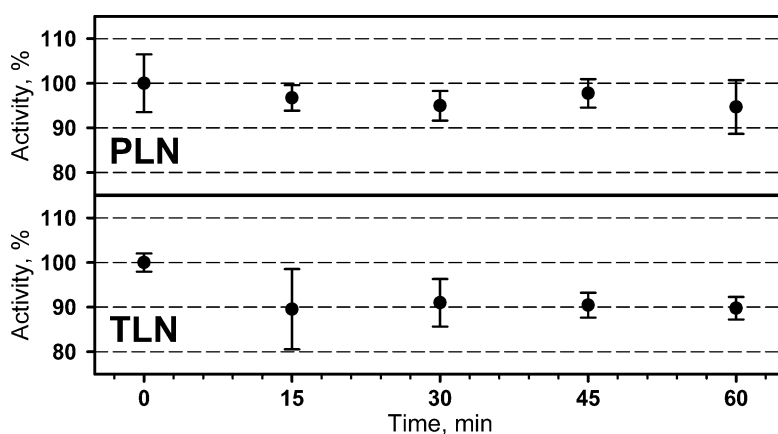

**Figure S5. Experimental stability of protealysin (PLN) and thermolysin (TLN).** Enzymes (10 nM) were incubated at 37°C for 15, 30, 45, or 60 min and placed on ice. Enzyme activities were assayed using Abz-RSVIK(Dnp) as described in the Methods section. The concentration of the enzymes in the reaction mixture was 2.5 nM. The substrate concentration was 15 and 13  $\mu$ M for PLN and TLN, respectively. The values are represented as the mean and SD of three measurements.

**THE RESULTS OF THE CHROMATOGRAPHY AND MASS-SPECTROMETRY  
ANALYSIS OF Abz-RSVIK(Dnp) BY PEPTIDE 2.0**

## Data Analysis Report

|                                     |                    |
|-------------------------------------|--------------------|
| <b>Peptide Name</b>                 | 1                  |
| <b>Sequence</b>                     | (2-Abz)-RSVIK(Dnp) |
| <b>M.W. (Theoretical)</b>           | 886.86 g/mol       |
| <b>Reference No.</b>                | 132537-001         |
| <b>% of Hydrophobic amino acids</b> | 40%                |
| <b>% of Acidic amino acids</b>      | 0%                 |
| <b>% of Basic amino acids</b>       | 40%                |
| <b>% of Neutral amino acids</b>     | 20%                |

| <b>Test</b>                  | <b>Results</b>                                                         |
|------------------------------|------------------------------------------------------------------------|
| <b>Appearance</b>            | Lyophilized material                                                   |
| <b>Amount</b>                | 50.0 mg                                                                |
| <b>MS (M+H<sup>+</sup>)</b>  | 887.14<br>(see raw data enclosed)                                      |
| <b>MS (M+Na<sup>+</sup>)</b> |                                                                        |
| <b>MS (M+K<sup>+</sup>)</b>  |                                                                        |
| <b>Purity (HPLC)</b>         | 98.66% (HPLC, 220 nm, C18, linear gradient)<br>(see raw data enclosed) |
| <b>Storage Conditions</b>    | -20 °C                                                                 |
| <b>Remarks</b>               | This product is supplied as trifluoroacetate salt                      |

Use recommended within 6 months from manufacturing date

(Analytical Data see next pages)

### HPLC Data

|                      |                                    |      |
|----------------------|------------------------------------|------|
| HPLC Column          | Agela (250×4.6mm I.D.) C18         |      |
| Detection wavelength | 220 nm                             |      |
| Gradient             | 38-54%B in 16 min                  |      |
| Buffer A             | 0.05%TFA in H <sub>2</sub> O       |      |
| Buffer B             | 0.05%TFA in 90% CH <sub>3</sub> CN |      |
| Gradient             | A                                  | B    |
| 0.01 min             | 62%                                | 38%  |
| 16.0 min             | 46%                                | 54%  |
| 16.1 min             | 0%                                 | 100% |
| 26.0 min             | STOP                               |      |

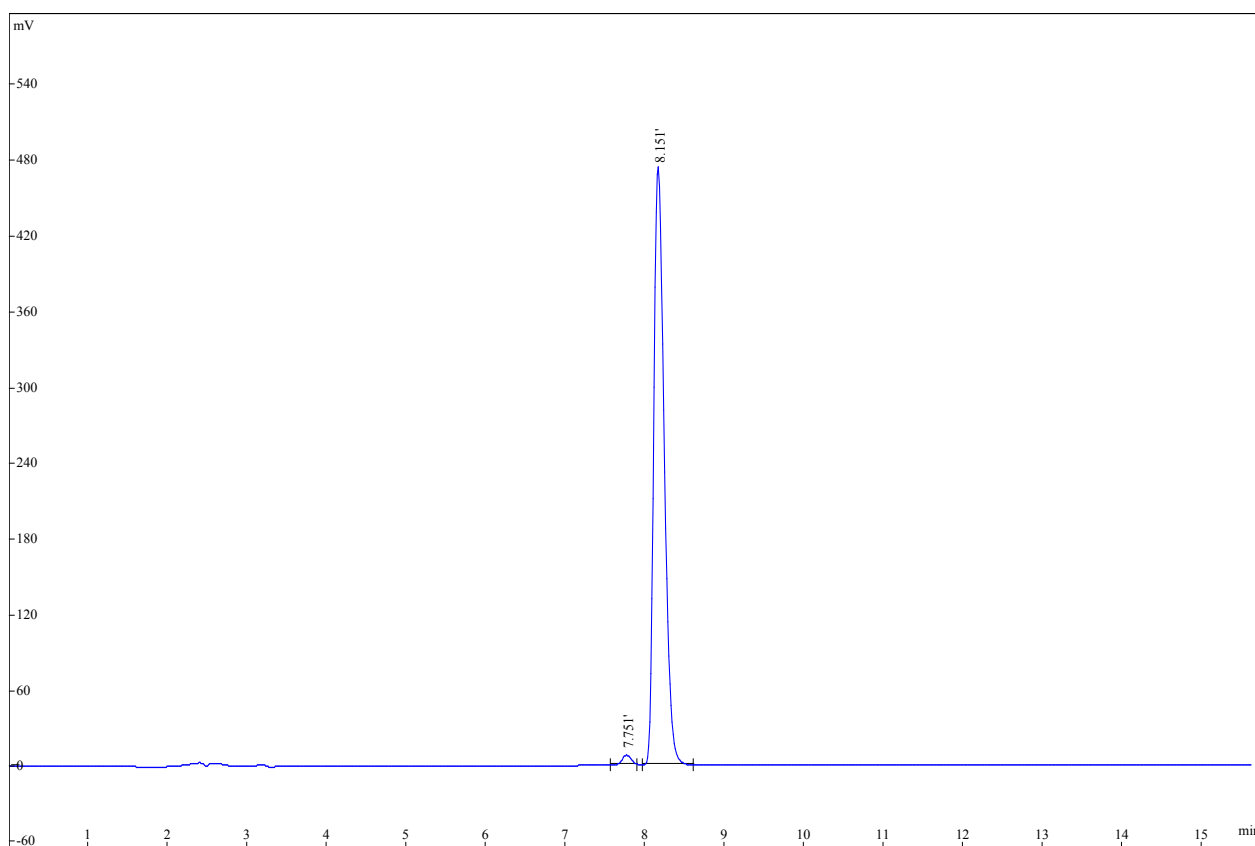

**Peak Results**

| Rank  | Time  | Conc. | Area    | Height |
|-------|-------|-------|---------|--------|
| 1     | 7.751 | 1.347 | 59079   | 7591   |
| 2     | 8.151 | 98.66 | 4327588 | 475139 |
| Total |       | 100   | 4386667 | 482730 |



**MS Data**

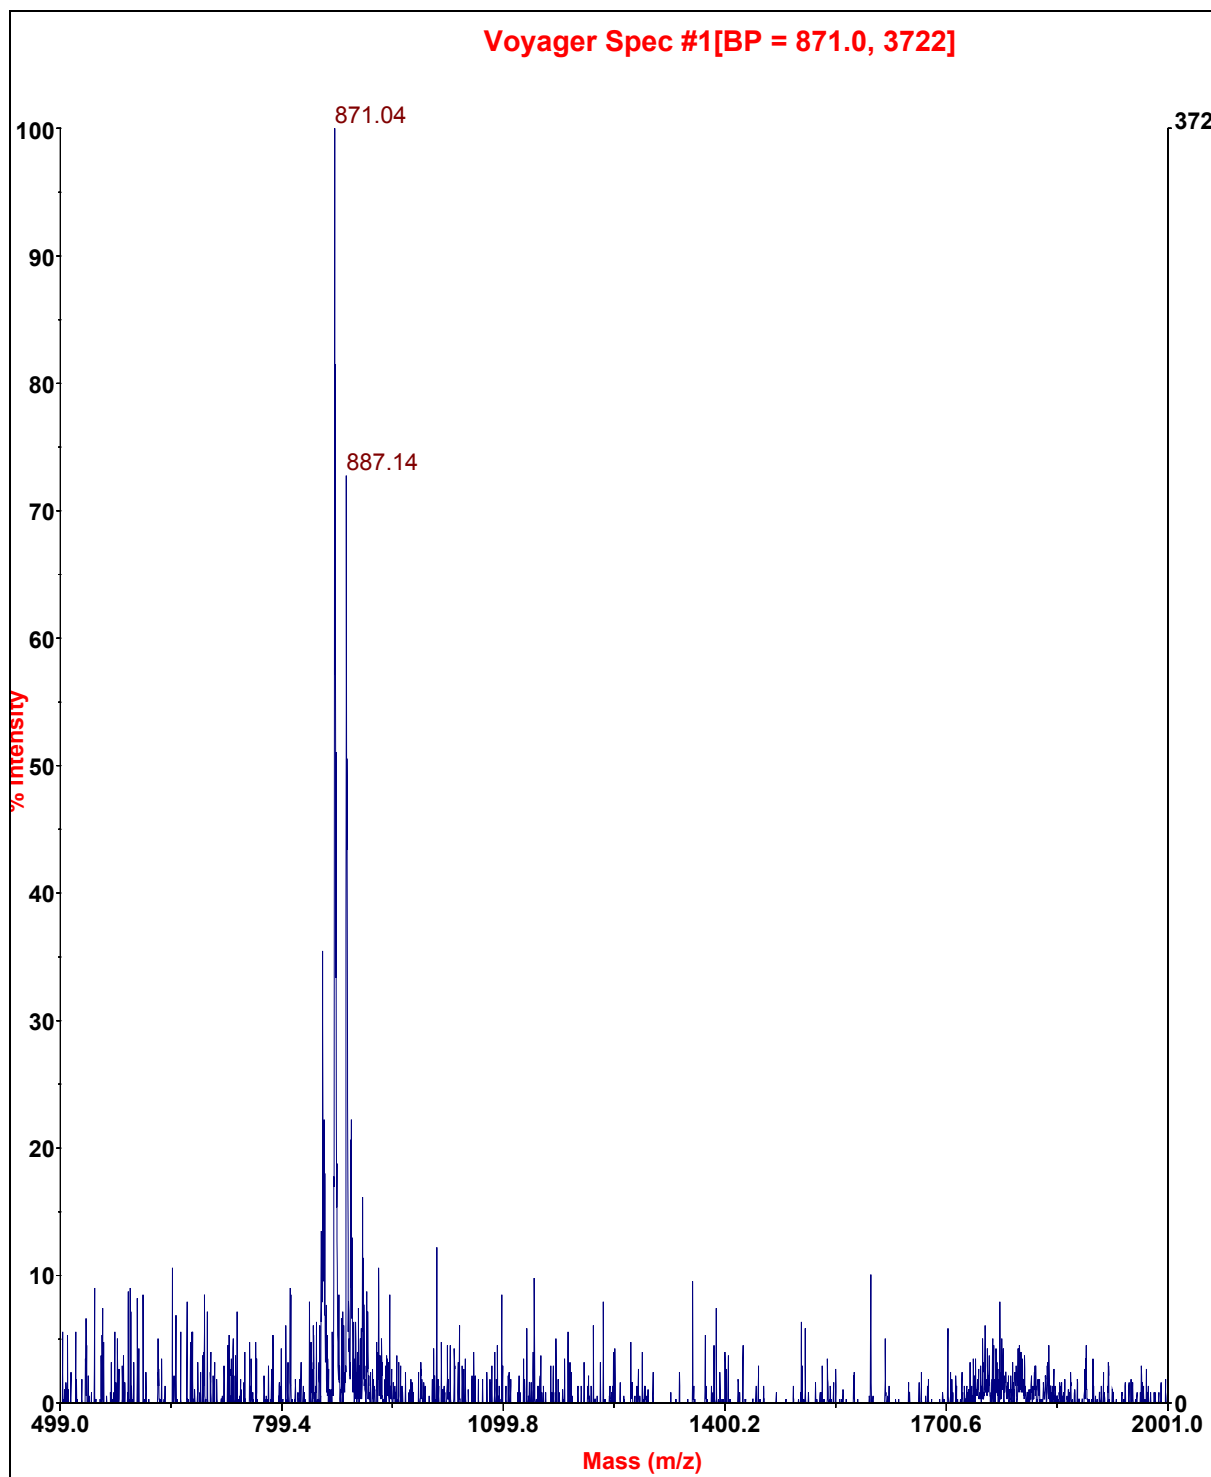

Supplement: 41598_2019_50764_MOESM1_ESM.pdf [file 41598_2019_50764_MOESM1_ESM.pdf]
